# Supplementary material for: Eukaryotic translation initiation factor 3 (eIF3) subunit e is essential for embryonic development and cell proliferation
Source: PubMed Central journal article supplement (PMC6070656; doi:10.1002/2211-5463.12482), 2018-07-05

Figure S3

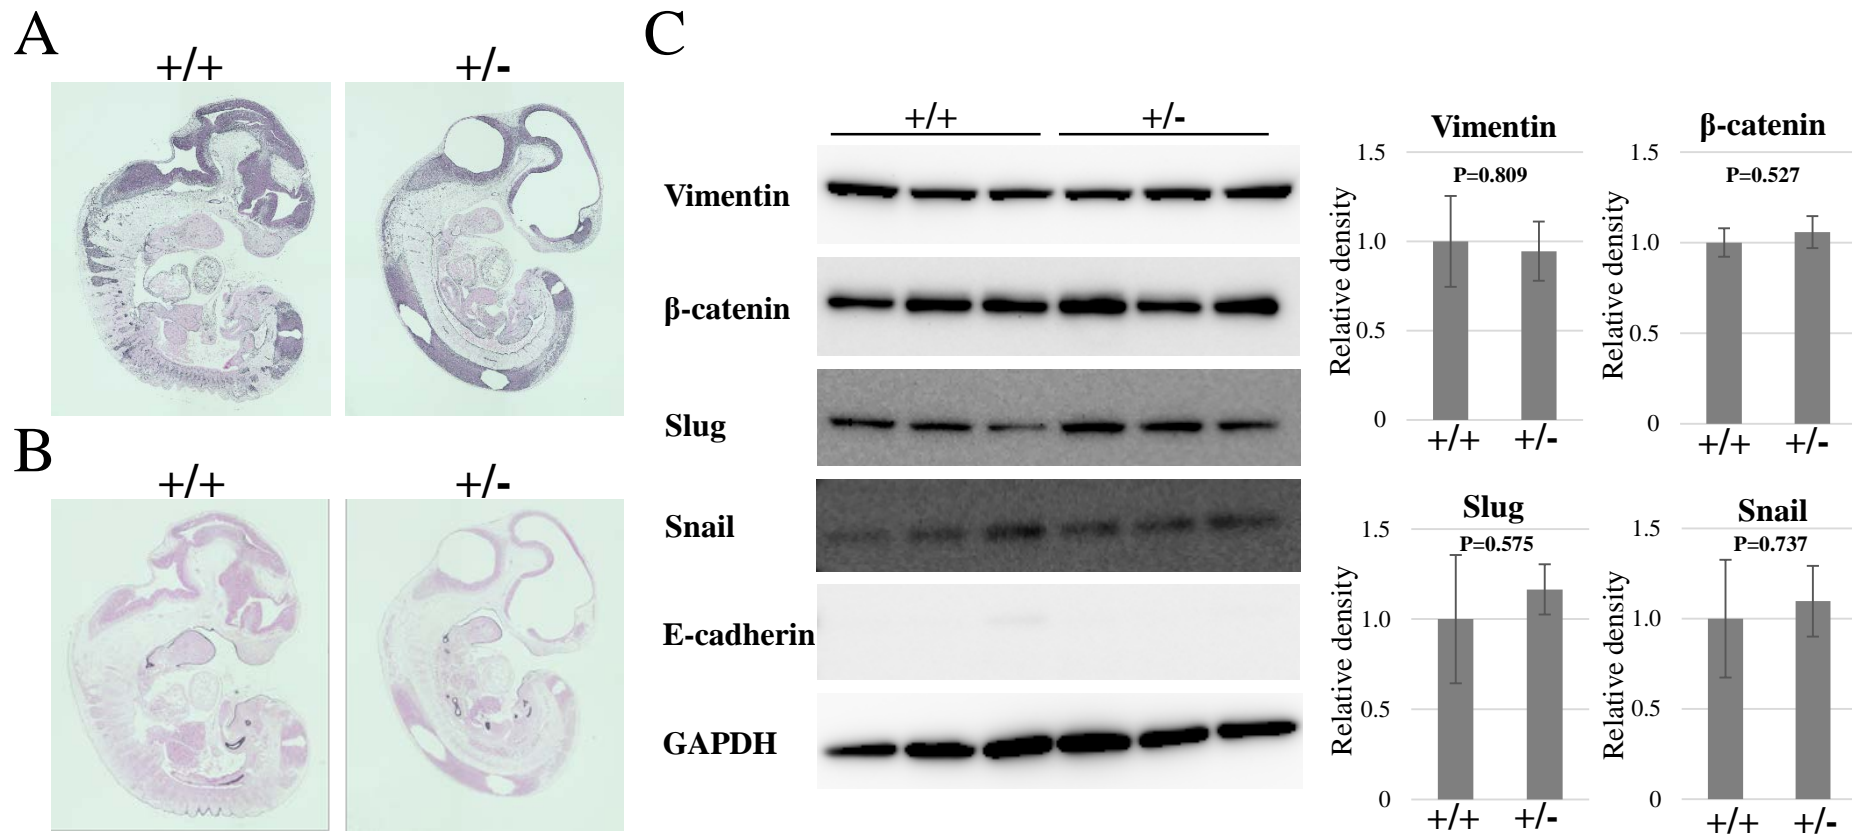

Supplement: FEB4-8-1188-s003.pdf [file FEB4-8-1188-s003.pdf]
